# Supplementary material for: Systematic study of short- and long-range correlations in RE3TaO7 weberite-type compounds by neutron total scattering and X-ray diffraction
Source: Royal Society of Chemistry journal article supplement (doi:10.1039/d3ta01042b), 2023-01-01
Supplement: d3ta01042b1.pdf [file d3ta01042b1.pdf]

**Supplementary information:**

**Supplementary Table 1:** Starting values for the  $\text{Ln}_3\text{TaO}_7$  prototype *Cmmm* (65) structure.

| $\text{Ln}_3\text{TbO}_7$ |                     | <b>a (Å)</b> | <b>b (Å)</b> | <b>c (Å)</b> |
|---------------------------|---------------------|--------------|--------------|--------------|
| <i>Cmmm</i>               |                     | 10.49940     | 7.42422      | 3.71211      |
| <b>Atom</b>               | <b>Wyckoff Site</b> | <b>x</b>     | <b>y</b>     | <b>z</b>     |
| Ta1                       | 2a                  | 0            | 0            | 0            |
| Ln1                       | 2b                  | 0            | 0.5          | 0            |
| Ln2                       | 4f                  | 0.25         | 0.25         | 0.5          |
| O1                        | 8p                  | 0.37388      | 0.29953      | 0            |
| O2                        | 2d                  | 0            | 0            | 0.5          |
| O3                        | 4h                  | 0.125        | 0.5          | 0.5          |

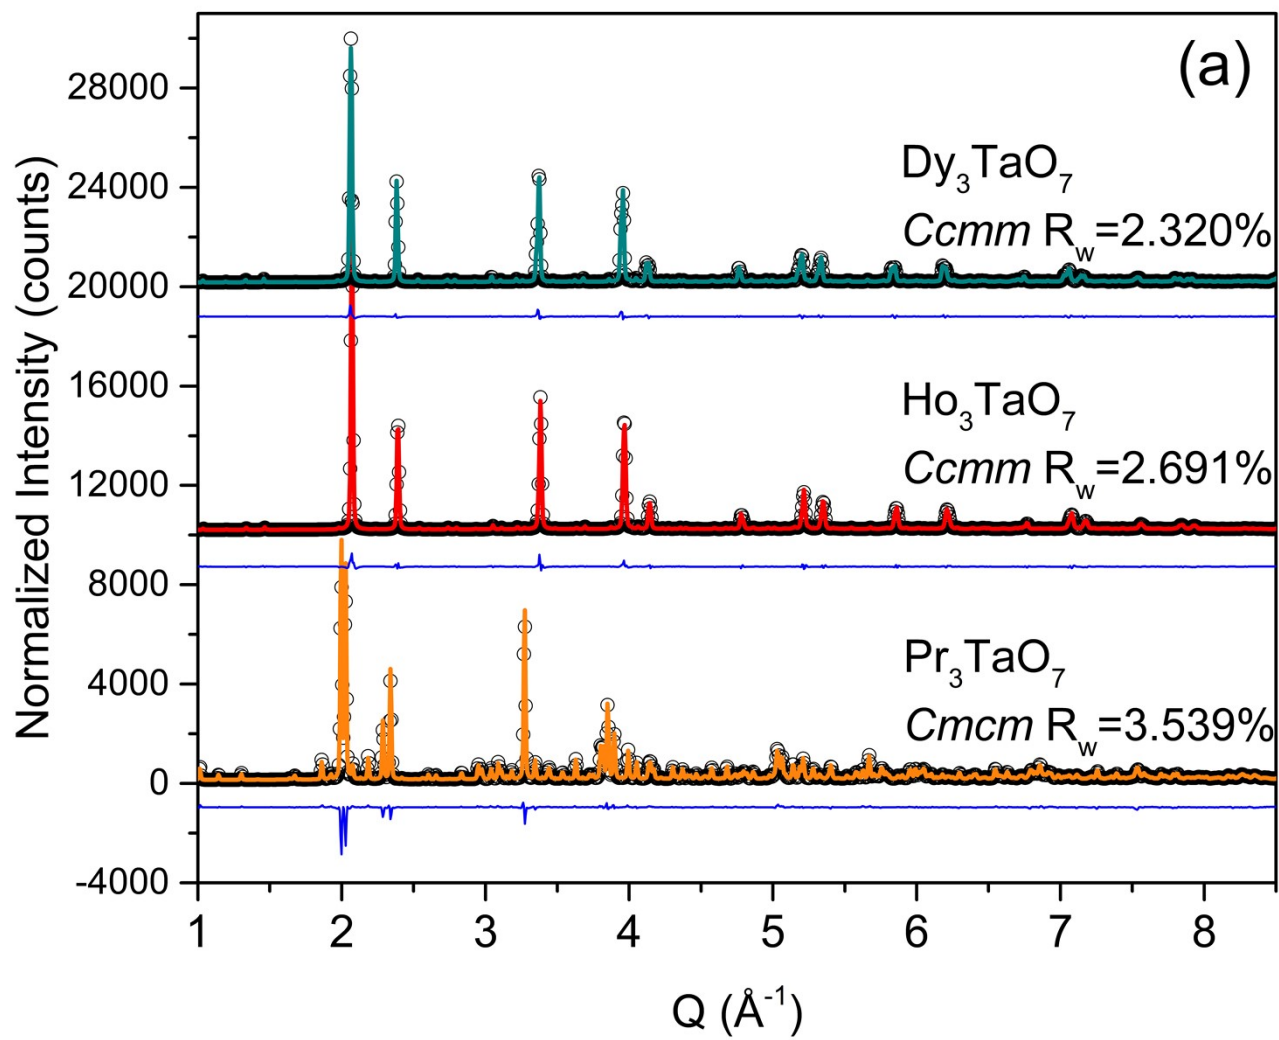

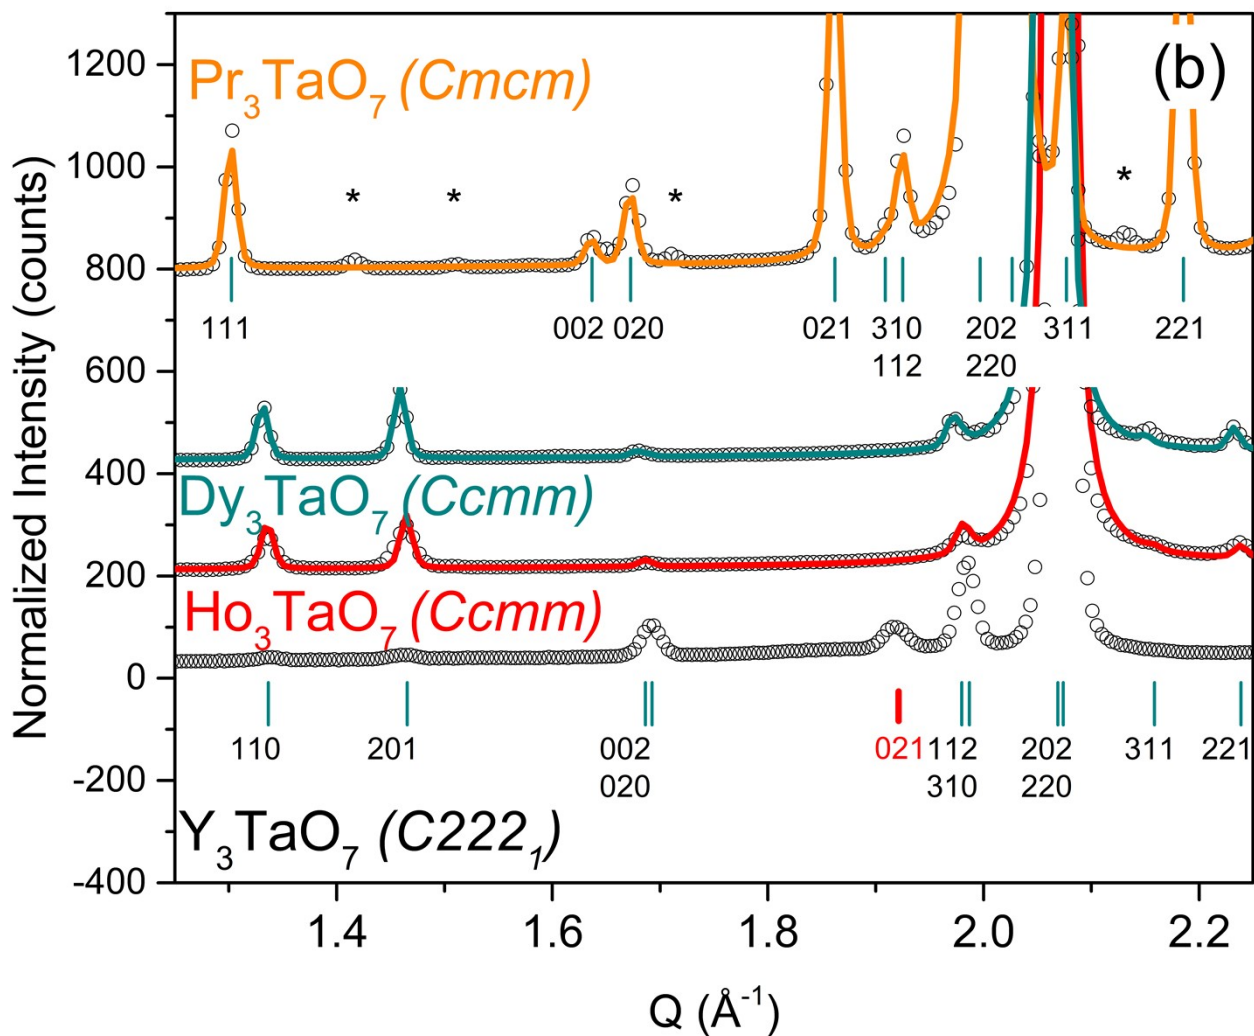

**Enlarged version of Figure 2:** (a) Stacked high-energy synchrotron X-ray diffraction patterns for  $A_3TaO_7$  ( $A = Pr, Dy, Ho$ ) as measured (black circles) and modeled (orange, cyan and red curves). Blue curves represent the difference between measurement and calculated model (space groups  $Cmcm$  and  $Ccm$ ). The reliability factor ( $R_w$ ) is reported for every sample. Diffraction patterns are offset by values of 10'000 and 20'000 respectively. (b) Expanded view of the low- $Q$  range of (a) using the same color labeling, along with diffraction data of  $Y_3TaO_7$  (black circles), which serves as reference measurement. Cyan ticks represent diffraction conditions allowed in (top)  $Cmcm$  and (bottom)  $Ccm$  space groups. Asterisks (\*) mark the  $PrTaO_4$  impurity phase reflections for  $Pr_3TaO_7$ . The red tick mark at  $\sim 1.93 \text{ \AA}^{-1}$  indicates the location of the (021) diffraction peak, which serves as space group distinction between  $C222_1$  and  $Ccm$  (and it is only allowed for  $C222_1$ ). Diffraction patterns are offset by values of 200, 400 and 800 respectively. Enlarged version of this figure is available in the supplementary section.

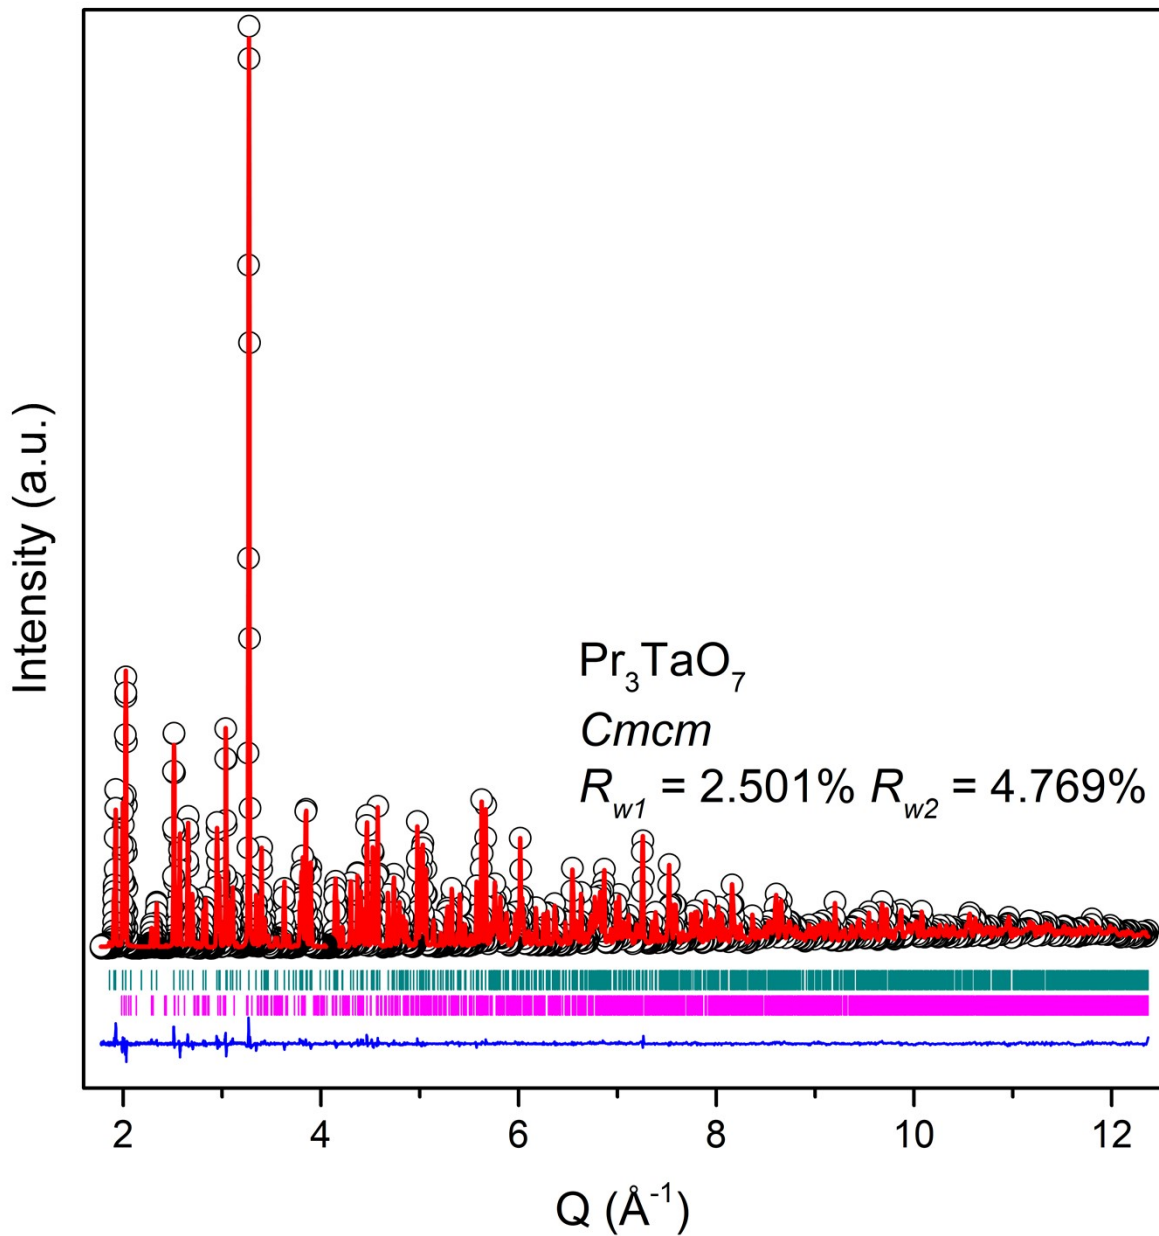

**Supplementary Figure 1:** POWGEN' high-resolution neutron diffraction pattern of  $\text{Pr}_3\text{TaO}_7$  measured at room temperature (black circles) and modeled (red curve) using *Cmcm* space group. The blue curve represents the difference curve between measurement and the model fit, with  $R_{w1}$  and  $R_{w2}$  being the fit reliability factors. Cyan and Magenta ticks indicate the expected Bragg peak positions according to the crystal structure models of  $\text{Pr}_3\text{TaO}_7$  and  $\text{PrTaO}_4$  impurity phase respectively.

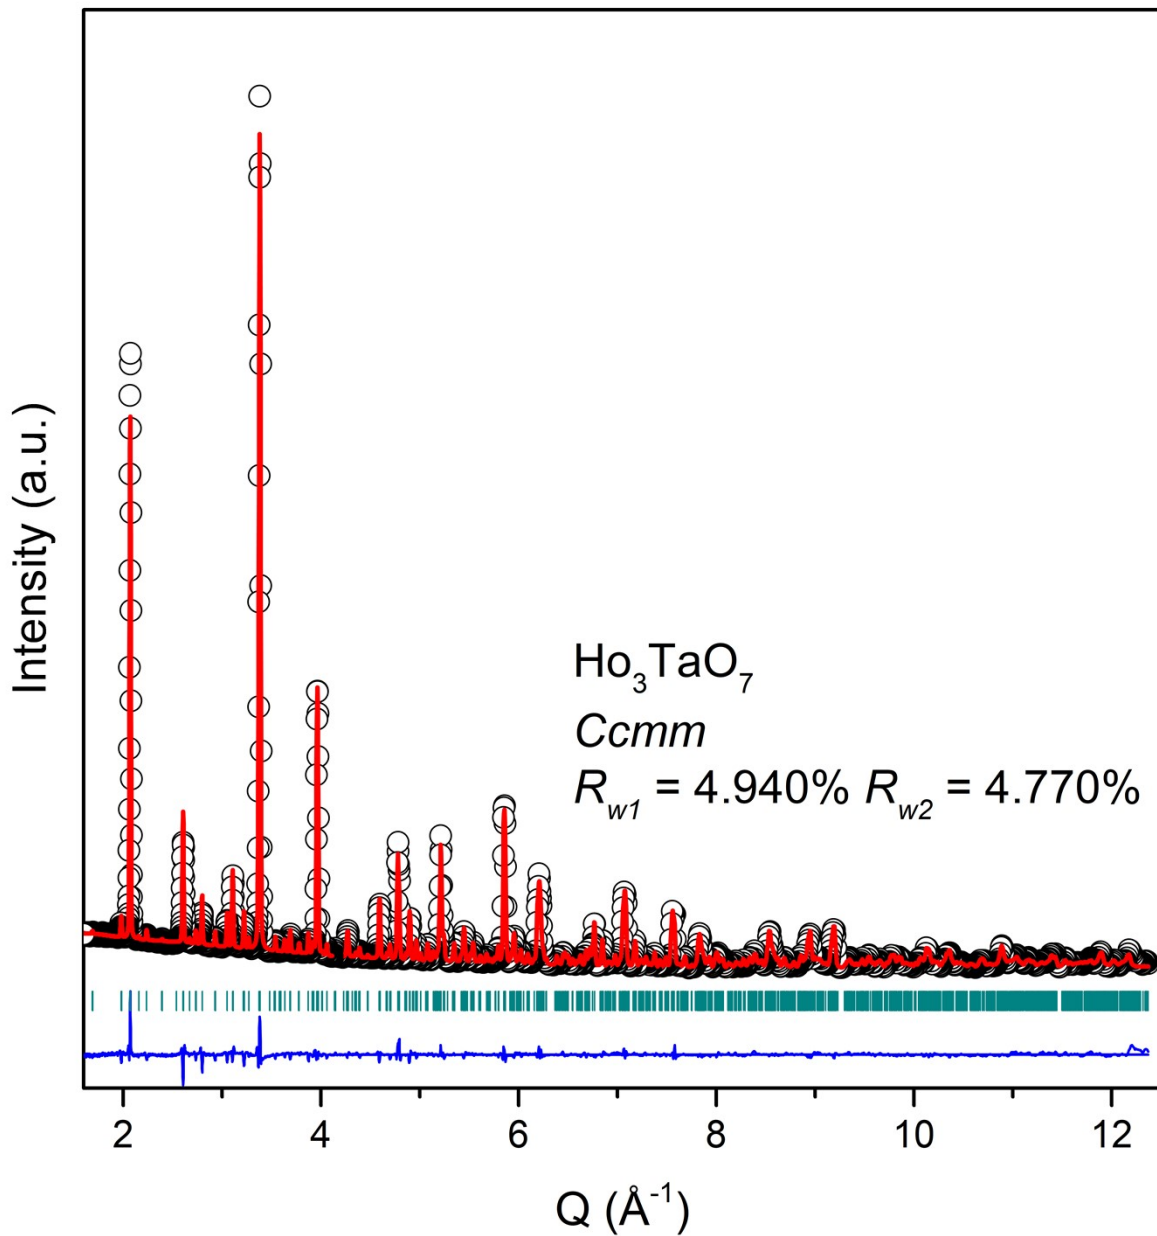

**Supplementary Figure 2:** POWGEN' high-resolution neutron diffraction pattern of  $\text{Ho}_3\text{TaO}_7$  measured at room temperature (black circles) and modeled (red curve) using *Cmmm* space group. The blue curve represents the difference curve between measurement and the model fit, with  $R_{w1}$  and  $R_{w2}$  being the fit reliability factors. Cyan ticks indicate the expected Bragg peak positions according to the crystal structure model.

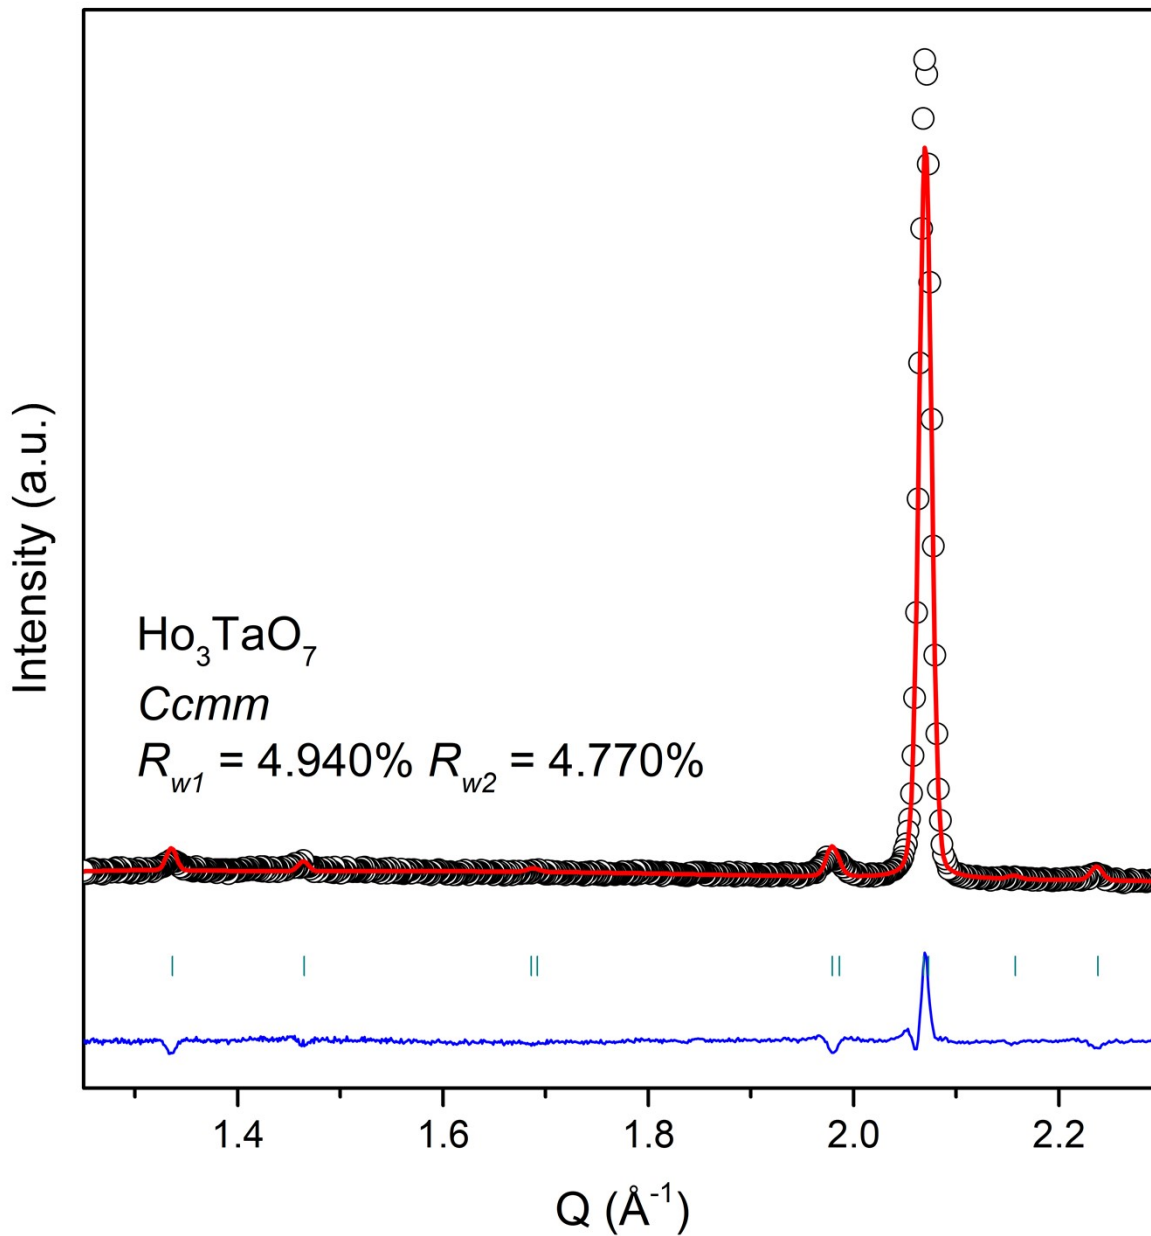

**Supplementary Figure 3:** An expanded view of low-Q region of POWGEN' high-resolution neutron diffraction pattern of Ho<sub>3</sub>TaO<sub>7</sub> measured at room temperature (black circles) and modeled (red curve) using *Ccmm* space group. The blue curve represents the difference curve between measurement and the model fit, with  $R_{w1}$  and  $R_{w2}$  being the fit reliability factors. Cyan ticks indicate the expected Bragg peak positions according to the crystal structure model.

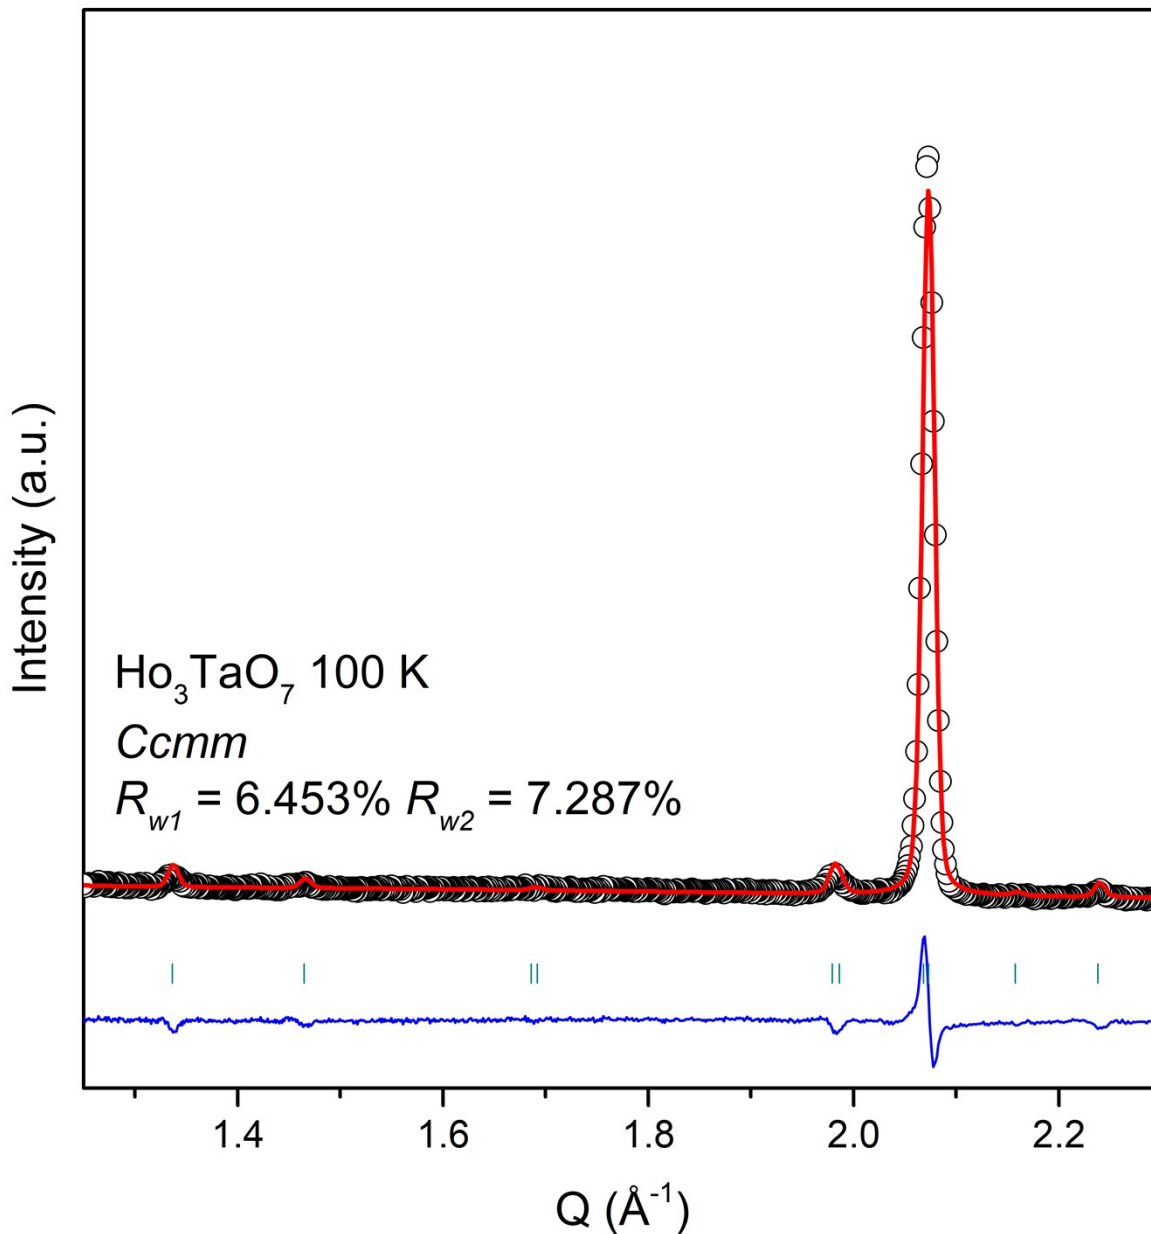

**Supplementary Figure 4:** Low-Q region of POWGEN' high-resolution neutron diffraction pattern of  $\text{Ho}_3\text{TaO}_7$  measured at 100 K (black circles) and modeled (red curve) using *Ccmm* space group. The blue curve represents the difference curve between measurement and the model fit, with  $R_{w1}$  and  $R_{w2}$  being the fit reliability factors. Cyan ticks indicate the expected Bragg peak positions according to the crystal structure model.

**Supplementary Table 2:** Structural information for long-range diffraction data refinements. Unit cell parameters, fractional positional coordinates and thermal factors are followed by sigma values. NOMAD and POWGEN denote neutron diffraction data collected at respective neutron total scattering instruments while SXRD denotes synchrotron X-ray diffraction data. Uiso denote isotropic thermal factors. When applicable, harmonic thermal factors ( $U_{ij}$ ) are shown with first row denoting  $U_{11}$ ,  $U_{22}$  and  $U_{33}$  factors while  $U_{12}$ ,  $U_{13}$  and  $U_{23}$  are shown in the second below.

| <b>Pr<sub>3</sub>TaO<sub>7</sub> (NOMAD)</b> |                     | <b>a (Å)</b> | <b>b (Å)</b> | <b>c (Å)</b> |             |
|----------------------------------------------|---------------------|--------------|--------------|--------------|-------------|
| <i>Cmcm</i> (63)                             |                     | 10.98712(17) | 7.51112(13)  | 7.67928(16)  |             |
| <b>Atom</b>                                  | <b>Wyckoff Site</b> | <b>x</b>     | <b>y</b>     | <b>z</b>     | <b>Uiso</b> |
| Pr1                                          | 4b                  | 0            | 0.5          | 0            | 0.0086(5)   |
| Pr2                                          | 8g                  | 0.22948(16)  | 0.7943(3)    | 0.25         | 0.0016(3)   |
| Ta1                                          | 4a                  | 0            | 0            | 0            | 0.0008(3)   |
| O1                                           | 16h                 | 0.37393(11)  | 0.68544(14)  | 0.03476(16)  | 0.0089(3)   |
| O2                                           | 8g                  | 0.13001(16)  | 0.5250(2)    | 0.25         | 0.0033(3)   |
| O3                                           | 4c                  | 0            | 0.9332(3)    | 0.25         | 0.0073(4)   |

| <b>Tb<sub>3</sub>TaO<sub>7</sub> (NOMAD)</b> |                     | <b>a (Å)</b> | <b>b (Å)</b> | <b>c (Å)</b> |             |
|----------------------------------------------|---------------------|--------------|--------------|--------------|-------------|
| <i>Ccmm</i> (63)                             |                     | 10.5716(2)   | 7.46997(16)  | 7.51362(14)  |             |
| <b>Atom</b>                                  | <b>Wyckoff Site</b> | <b>x</b>     | <b>y</b>     | <b>z</b>     | <b>Uiso</b> |
| Tb1                                          | 4b                  | 0.5          | 0            | 0            | 0.0075(3)   |
| Tb2                                          | 8g                  | 0.23511(15)  | 0.2357(2)    | 0.75         | 0.0030(2)   |
| Ta1                                          | 4a                  | 0            | 0            | 0            | 0.0015(3)   |
| O1                                           | 16h                 | 0.37637(16)  | 0.30011(18)  | 0.9717(2)    | 0.0149(4)   |
| O2                                           | 4c                  | 0.0614(4)    | 0            | 0.75         | 0.0163(7)   |
| O3                                           | 4c                  | 0.6283(3)    | 0            | 0.75         | 0.0018(4)   |
| O4                                           | 4c                  | 0.3625(4)    | 0            | 0.75         | 0.0086(6)   |



| <b>Ho<sub>3</sub>TaO<sub>7</sub> (NOMAD)</b> |                     | <b>a (Å)</b> | <b>b (Å)</b> | <b>c (Å)</b> |             |  |
|----------------------------------------------|---------------------|--------------|--------------|--------------|-------------|--|
| <i>Cmmm</i> (63)                             |                     | 10.4933(3)   | 7.4250(2)    | 7.4553(2)    |             |  |
| <b>Atom</b>                                  | <b>Wyckoff Site</b> | <b>x</b>     | <b>y</b>     | <b>z</b>     | <b>Uiso</b> |  |
| Ho1                                          | 4b                  | 0.5          | 0            | 0            | 0.0247(8)   |  |
| Ho2                                          | 8g                  | 0.2404(2)    | 0.2386(3)    | 0.75         | 0.0013(3)   |  |
| Ta1                                          | 4a                  | 0            | 0            | 0            | 0.0171(6)   |  |
| O1                                           | 16h                 | 0.3766(4)    | 0.2891(4)    | 0.9745(5)    | 0.0294(8)   |  |
| O2                                           | 4c                  | 0.0622(7)    | 0            | 0.75         | 0.0227(13)  |  |
| O3                                           | 4c                  | 0.6281(6)    | 0            | 0.75         | 0.0129(9)   |  |
| O4                                           | 4c                  | 0.3621(7)    | 0            | 0.75         | 0.0218(14)  |  |

| <b>Ho<sub>3</sub>TaO<sub>7</sub> (NOMAD)</b> |                     | <b>a (Å)</b> | <b>b (Å)</b> | <b>c (Å)</b> |                  |             |
|----------------------------------------------|---------------------|--------------|--------------|--------------|------------------|-------------|
| <i>Fm-3m</i> (225)                           |                     | 5.25850(11)  | 5.25850(11)  | 5.25850(11)  |                  |             |
| <b>Atom</b>                                  | <b>Wyckoff Site</b> | <b>x</b>     | <b>y</b>     | <b>z</b>     | <b>Occupancy</b> | <b>Uiso</b> |
| Ho1                                          | 4a                  | 0            | 0            | 0            | 0.75             | 0.0212(5)   |
| Ta1                                          | 4a                  | 0            | 0            | 0            | 0.25             | 0.0212(5)   |
| O1                                           | 8c                  | 0.25         | 0.25         | 0.25         | 0.875            | 0.0681(8)   |

| <b>Tm<sub>3</sub>TaO<sub>7</sub> (NOMAD)</b> |                     | <b>a (Å)</b> | <b>b (Å)</b> | <b>c (Å)</b> |                  |             |
|----------------------------------------------|---------------------|--------------|--------------|--------------|------------------|-------------|
| <i>Fm-3m</i> (225)                           |                     | 5.21362(5)   | 5.21362(5)   | 5.21362(5)   |                  |             |
| <b>Atom</b>                                  | <b>Wyckoff Site</b> | <b>x</b>     | <b>y</b>     | <b>z</b>     | <b>Occupancy</b> | <b>Uiso</b> |
| Tm1                                          | 4a                  | 0            | 0            | 0            | 0.75             | 0.0179(3)   |
| Ta1                                          | 4a                  | 0            | 0            | 0            | 0.25             | 0.0179(3)   |
| O1                                           | 8c                  | 0.25         | 0.25         | 0.25         | 0.875            | 0.0595(5)   |

| <b>Yb<sub>3</sub>TaO<sub>7</sub> (NOMAD)</b> |                     | <b>a (Å)</b> | <b>b (Å)</b> | <b>c (Å)</b> |                  |             |
|----------------------------------------------|---------------------|--------------|--------------|--------------|------------------|-------------|
| <i>Fm-3m</i> (225)                           |                     | 5.19453(5)   | 5.19453(5)   | 5.19453(5)   |                  |             |
| <b>Atom</b>                                  | <b>Wyckoff Site</b> | <b>x</b>     | <b>y</b>     | <b>z</b>     | <b>Occupancy</b> | <b>Uiso</b> |
| Ho1                                          | 4a                  | 0            | 0            | 0            | 0.75             | 0.0214(3)   |
| Ta1                                          | 4a                  | 0            | 0            | 0            | 0.25             | 0.0214(3)   |
| O1                                           | 8c                  | 0.25         | 0.25         | 0.25         | 0.875            | 0.0577(5)   |

| <b>Pr<sub>3</sub>TaO<sub>7</sub> (SXR)</b> |                     | <b>a (Å)</b> | <b>b (Å)</b> | <b>c (Å)</b> |             |
|--------------------------------------------|---------------------|--------------|--------------|--------------|-------------|
| <i>Cmcm</i> (63)                           |                     | 10.98488(18) | 7.51246(12)  | 7.67712(13)  |             |
| <b>Atom</b>                                | <b>Wyckoff Site</b> | <b>x</b>     | <b>y</b>     | <b>z</b>     | <b>Uiso</b> |
| Pr1                                        | 4b                  | 0            | 0.5          | 0            | 0.0087(5)   |
| Pr2                                        | 8g                  | 0.22797(11)  | 0.79573(15)  | 0.25000      | 0.0031(4)   |
| Ta1                                        | 4a                  | 0            | 0            | 0            | 0.0014(4)   |
| O1                                         | 16h                 | 0.3740(9)    | 0.6822(12)   | 0.0361(12)   | 0.002(3)    |
| O2                                         | 8g                  | 0.1285(16)   | 0.528(2)     | 0.25         | 0.012(4)    |
| O3                                         | 4c                  | 0            | 0.9421(27)   | 0.25         | 0.003(6)    |

| <b>Dy<sub>3</sub>TaO<sub>7</sub> (SXR)</b> |                     | <b>a (Å)</b> | <b>b (Å)</b> | <b>c (Å)</b> |             |
|--------------------------------------------|---------------------|--------------|--------------|--------------|-------------|
| <i>Ccmm</i> (63)                           |                     | 10.52150(19) | 7.43849(13)  | 7.48792(10)  |             |
| <b>Atom</b>                                | <b>Wyckoff Site</b> | <b>x</b>     | <b>y</b>     | <b>z</b>     | <b>Uiso</b> |
| Dy1                                        | 4b                  | 0.5          | 0            | 0            | 0.0109(6)   |
| Dy2                                        | 8g                  | 0.23408(9)   | 0.23493(13)  | 0.75         | 0.0069(3)   |
| Ta1                                        | 4a                  | 0            | 0            | 0            | 0.0044(5)   |
| O1                                         | 16h                 | 0.3778(12)   | 0.3046(15)   | 0.9685(13)   | 0.002(3)    |
| O2                                         | 4c                  | 0.058(3)     | 0            | 0.75         | 0.018(7)    |
| O3                                         | 4c                  | 0.630(3)     | 0            | 0.75         | 0.003(6)    |
| O4                                         | 4c                  | 0.357(3)     | 0            | 0.75         | 0.009(7)    |

| <b>Ho<sub>3</sub>TaO<sub>7</sub> (SXR)</b> |                     | <b>a (Å)</b> | <b>b (Å)</b> | <b>c (Å)</b> |             |
|--------------------------------------------|---------------------|--------------|--------------|--------------|-------------|
| <i>Ccmm</i> (63)                           |                     | 10.4852(3)   | 7.4241(2)    | 7.45141(17)  |             |
| <b>Atom</b>                                | <b>Wyckoff Site</b> | <b>x</b>     | <b>y</b>     | <b>z</b>     | <b>Uiso</b> |
| Ho1                                        | 4b                  | 0.5          | 0            | 0            | 0.0131(9)   |
| Ho2                                        | 8g                  | 0.23721(14)  | 0.23741(19)  | 0.75         | 0.0111(4)   |
| Ta1                                        | 4a                  | 0            | 0            | 0            | 0.0074(8)   |
| O1                                         | 16h                 | 0.377(2)     | 0.298(3)     | 0.971(2)     | 0.007(6)    |
| O2                                         | 4c                  | 0.060(4)     | 0            | 0.75         | 0.018(11)   |
| O3                                         | 4c                  | 0.631(5)     | 0            | 0.75         | 0.027(13)   |
| O4                                         | 4c                  | 0.358(5)     | 0            | 0.75         | 0.026(14)   |

| <b>Pr<sub>3</sub>TaO<sub>7</sub></b><br>(POWGEN, RT) |                     | <b>a (Å)</b> | <b>b (Å)</b> | <b>c (Å)</b> |                         |                         |                         |
|------------------------------------------------------|---------------------|--------------|--------------|--------------|-------------------------|-------------------------|-------------------------|
| <i>Cmcm</i> (63)                                     |                     | 10.98883(4)  | 7.51223(3)   | 7.68015(3)   |                         |                         |                         |
| <b>Atom</b>                                          | <b>Wyckoff Site</b> | <b>x</b>     | <b>y</b>     | <b>z</b>     | $\frac{U_{11}}{U_{12}}$ | $\frac{U_{22}}{U_{13}}$ | $\frac{U_{33}}{U_{23}}$ |
| Pr1                                                  | 4b                  | 0            | 0.5          | 0            | 0.0062(5)               | 0.0249(8)               | 0.0027(5)               |
|                                                      |                     |              |              |              | 0                       | 0                       | -0.0022(10)             |
| Pr2                                                  | 8g                  | 0.22838(8)   | 0.79583(12)  | 0.25         | 0.0056(4)               | 0.0083(5)               | 0.0037(3)               |
|                                                      |                     |              |              |              | -0.0007(6)              | 0                       | 0                       |
| Ta1                                                  | 4a                  | 0            | 0            | 0            | 0.0017(3)               | 0.0062(4)               | 0.0009(3)               |
|                                                      |                     |              |              |              | 0                       | 0                       | 0.0000(5)               |
| O1                                                   | 16h                 | 0.37429(5)   | 0.68615(9)   | 0.03461(7)   | 0.0116(3)               | 0.0239(3)               | 0.0056(2)               |
|                                                      |                     |              |              |              | 0.0126(5)               | -0.0009(4)              | -0.0035(4)              |
| O2                                                   | 8g                  | 0.13092(7)   | 0.52372(11)  | 0.25         | 0.0053(3)               | 0.0086(4)               | 0.0065(3)               |
|                                                      |                     |              |              |              | -0.0003(6)              | 0                       | 0                       |
| O3                                                   | 4c                  | 0            | 0.93200(15)  | 0.25         | 0.0125(5)               | 0.0110(5)               | 0.0006(4)               |
|                                                      |                     |              |              |              | 0                       | 0                       | 0                       |

| <b>Ho<sub>3</sub>TaO<sub>7</sub></b><br>(POWGEN, RT) |                     | <b>a (Å)</b> | <b>b (Å)</b> | <b>c (Å)</b> |                         |                         |                         |
|------------------------------------------------------|---------------------|--------------|--------------|--------------|-------------------------|-------------------------|-------------------------|
| <i>Cmmm</i> (63)                                     |                     | 10.48914(18) | 7.42688(14)  | 7.45209(13)  |                         |                         |                         |
| <b>Atom</b>                                          | <b>Wyckoff Site</b> | <b>x</b>     | <b>y</b>     | <b>z</b>     | $\frac{U_{11}}{U_{12}}$ | $\frac{U_{22}}{U_{13}}$ | $\frac{U_{33}}{U_{23}}$ |
| Ho1                                                  | 4b                  | 0.5          | 0            | 0            | 0.0055(13)              | 0.0122(14)              | 0.0077(12)              |
|                                                      |                     |              |              |              | 0                       | -0.0031(17)             | 0                       |
| Ho2                                                  | 8g                  | 0.23578(15)  | 0.2354(2)    | 0.75         | 0.0053(7)               | 0.0036(7)               | 0.0039(8)               |
|                                                      |                     |              |              |              | 0.0016(11)              | 0                       | 0                       |
| Ta1                                                  | 4a                  | 0            | 0            | 0            | 0.0006(12)              | 0.0031(13)              | 0.0026(11)              |
|                                                      |                     |              |              |              | 0                       | 0.0032(18)              | 0                       |
| O1                                                   | 16h                 | 0.3761(2)    | 0.2999(3)    | 0.9711 (3)   | 0.0116(9)               | 0.0191(9)               | 0.0171(10)              |
|                                                      |                     |              |              |              | -0.0057(15)             | 0.0035(15)              | -0.0063(13)             |
| O2                                                   | 4c                  | 0.0675(4)    | 0            | 0.75         | 0.0180(18)              | 0.0106(19)              | 0.0058(16)              |
|                                                      |                     |              |              |              | 0                       | 0                       | 0                       |
| O3                                                   | 4c                  | 0.6306(4)    | 0            | 0.75         | 0.0015(15)              | 0.0033(14)              | 0.0069(15)              |
|                                                      |                     |              |              |              | 0                       | 0                       | 0                       |
| O4                                                   | 4c                  | 0.3620(4)    | 0            | 0.75         | 0.0047(17)              | 0.0089(17)              | 0.0111(16)              |
|                                                      |                     |              |              |              | 0                       | 0                       | 0                       |

**Supplementary Table 3:** Structural information for room temperature (RT) short-range PDF data refinements. Unit cell parameters, fractional positional coordinates and thermal factors are followed by sigma values.

| <b>Pr<sub>3</sub>TaO<sub>7</sub></b><br>(PDF, RT)<br><i>Cmcm</i> (63) |                     | <b>a (Å)</b> | <b>b (Å)</b> | <b>c (Å)</b> |                         |                         |                         |
|-----------------------------------------------------------------------|---------------------|--------------|--------------|--------------|-------------------------|-------------------------|-------------------------|
| <b>Atom</b>                                                           | <b>Wyckoff Site</b> | <b>x</b>     | <b>y</b>     | <b>z</b>     | $\frac{U_{11}}{U_{12}}$ | $\frac{U_{22}}{U_{13}}$ | $\frac{U_{33}}{U_{23}}$ |
| Pr1                                                                   | 4b                  | 0            | 0.5          | 0            | 0.0094(18)              | 0.044(4)                | 0.001(1)                |
|                                                                       |                     |              |              |              | 0                       | 0                       | -0.003(2)               |
| Pr2                                                                   | 8g                  | 0.2290(3)    | 0.2041(5)    | 0.25         | 0.0061(9)               | 0.008(1)                | 0.0072(9)               |
|                                                                       |                     |              |              |              | -0.0018(6)              | 0                       | 0                       |
| Ta1                                                                   | 4a                  | 0            | 0            | 0            | 0.0019(6)               | 0.0071(11)              | 0.0055(8)               |
|                                                                       |                     |              |              |              | 0                       | 0                       | -0.0005(6)              |
| O1                                                                    | 16h                 | 0.37592(18)  | 0.3116(4)    | 0.0367(3)    | 0.0119(9)               | 0.0279(17)              | 0.0066(5)               |
|                                                                       |                     |              |              |              | -0.013(1)               | -0.0025(5)              | 0.0043(7)               |
| O2                                                                    | 8g                  | 0.1306(3)    | 0.4767(5)    | 0.25         | 0.0074(8)               | 0.0061(8)               | 0.0080(7)               |
|                                                                       |                     |              |              |              | 0.0004(8)               | 0                       | 0                       |
| O3                                                                    | 4c                  | 0            | 0.0646(5)    | 0.25         | 0.0157(14)              | 0.003(1)                | 0.0042(7)               |
|                                                                       |                     |              |              |              | 0                       | 0                       | 0                       |

| <b>Tb<sub>3</sub>TaO<sub>7</sub></b><br>(PDF, RT) |                     | <b>a (Å)</b> | <b>b (Å)</b> | <b>c (Å)</b> |                         |                         |                         |
|---------------------------------------------------|---------------------|--------------|--------------|--------------|-------------------------|-------------------------|-------------------------|
| <i>Ccmm</i> (63)                                  |                     | 10.529(6)    | 7.492(3)     | 7.514(3)     |                         |                         |                         |
| <b>Atom</b>                                       | <b>Wyckoff Site</b> | <b>x</b>     | <b>y</b>     | <b>z</b>     | $\frac{U_{11}}{U_{12}}$ | $\frac{U_{22}}{U_{13}}$ | $\frac{U_{33}}{U_{23}}$ |
|                                                   |                     |              |              |              | Tb1                     | 4b                      | 0.5                     |
| Tb2                                               | 8g                  | 0.2324(2)    | 0.2378(5)    | 0.75         | 0.0073(19)              | 0.049(4)                | 0.0083(14)              |
| Ta1                                               | 4a                  | 0            | 0            | 0            | 0                       | 0.0068(9)               | 0                       |
| O1                                                | 16h                 | 0.3766(3)    | 0.3029(5)    | 0.9680(5)    | 0.0086(6)               | 0.0045(6)               | 0.0094(7)               |
| O2                                                | 4c                  | 0.0641(6)    | 0            | 0.75         | 0.0022(5)               | 0                       | 0                       |
| O3                                                | 4c                  | 0.6308(5)    | 0            | 0.75         | 0.0152(19)              | 0.005(1)                | 0.0108(15)              |
| O4                                                | 4c                  | 0.3641(5)    | 0            | 0.75         | 0                       | 0.0044(11)              | 0                       |
|                                                   |                     |              |              |              | 0.0178(12)              | 0.0358(15)              | 0.0108(8)               |
|                                                   |                     |              |              |              | -0.020(1)               | 0.0067(7)               | -0.0072(9)              |
|                                                   |                     |              |              |              | 0.0132(18)              | 0.0066(14)              | 0.0102(15)              |
|                                                   |                     |              |              |              | 0                       | 0                       | 0                       |
|                                                   |                     |              |              |              | 0.0020(9)               | 0.0120(14)              | 0.0107(16)              |
|                                                   |                     |              |              |              | 0                       | 0                       | 0                       |
|                                                   |                     |              |              |              | 0.0071(11)              | 0.0081(13)              | 0.0028(9)               |
|                                                   |                     |              |              |              | 0                       | 0                       | 0                       |

| <b>Ho<sub>3</sub>TaO<sub>7</sub></b><br>(PDF, RT) |                     | <b>a (Å)</b> | <b>b (Å)</b> | <b>c (Å)</b> |                         |                         |                         |
|---------------------------------------------------|---------------------|--------------|--------------|--------------|-------------------------|-------------------------|-------------------------|
| <i>Ccmm</i> (63)                                  |                     | 10.458(7)    | 7.440(4)     | 7.457(4)     |                         |                         |                         |
| <b>Atom</b>                                       | <b>Wyckoff Site</b> | <b>x</b>     | <b>y</b>     | <b>z</b>     | $\frac{U_{11}}{U_{12}}$ | $\frac{U_{22}}{U_{13}}$ | $\frac{U_{33}}{U_{23}}$ |
|                                                   |                     |              |              |              | Ho1                     | 4b                      | 0.5                     |
| Ho2                                               | 8g                  | 0.2313(4)    | 0.2412(6)    | 0.75         | 0.0056(17)              | 0.083(7)                | 0.0045(12)              |
| Ta1                                               | 4a                  | 0            | 0            | 0            | 0                       | -0.0054(14)             | 0                       |
| O1                                                | 16h                 | 0.3778(3)    | 0.2965(7)    | 0.9709(8)    | 0.0109(9)               | 0.0041(6)               | 0.01476(13)             |
| O2                                                | 4c                  | 0.0619(9)    | 0            | 0.75         | 0.0030(8)               | 0                       | 0                       |
| O3                                                | 4c                  | 0.6276(9)    | 0            | 0.75         | 0.014(2)                | 0.0054(16)              | 0.010(3)                |
|                                                   |                     |              |              |              | 0                       | 0.0065(15)              | 0                       |
|                                                   |                     |              |              |              | 0.0139(14)              | 0.028(2)                | 0.0137(13)              |
|                                                   |                     |              |              |              | -0.0158(14)             | 0.0015(13)              | 0.0002(18)              |
|                                                   |                     |              |              |              | 0.017(3)                | 0.009(3)                | 0.009(3)                |
|                                                   |                     |              |              |              | 0                       | 0                       | 0                       |
|                                                   |                     |              |              |              | 0.009(3)                | 0.0078(15)              | 0.011(3)                |
|                                                   |                     |              |              |              | 0                       | 0                       | 0                       |

|    |    |           |   |      |          |          |            |
|----|----|-----------|---|------|----------|----------|------------|
| O4 | 4c | 0.3624(8) | 0 | 0.75 | 0.002(1) | 0.012(3) | 0.0077(19) |
|    |    |           |   |      | 0        | 0        | 0          |

---

|                                            |                     |              |              |              |                  |             |
|--------------------------------------------|---------------------|--------------|--------------|--------------|------------------|-------------|
| <b>Ho<sub>3</sub>TaO<sub>7</sub></b> (PDF) |                     | <b>a (Å)</b> | <b>b (Å)</b> | <b>c (Å)</b> |                  |             |
| <i>Fm-3m</i> (225)                         |                     | 5.2708(6)    | 5.2708(6)    | 5.2708(6)    |                  |             |
| <b>Atom</b>                                | <b>Wyckoff Site</b> | <b>x</b>     | <b>y</b>     | <b>z</b>     | <b>Occupancy</b> | <b>Uiso</b> |
| Ho1                                        | 4a                  | 0            | 0            | 0            | 0.75             | 0.0201(3)   |
| Ta1                                        | 4a                  | 0            | 0            | 0            | 0.25             | 0.0201(3)   |
| O1                                         | 8c                  | 0.25         | 0.25         | 0.25         | 0.875            | 0.0590(5)   |

---

|                                            |                     |              |              |              |                  |             |
|--------------------------------------------|---------------------|--------------|--------------|--------------|------------------|-------------|
| <b>Tm<sub>3</sub>TaO<sub>7</sub></b> (PDF) |                     | <b>a (Å)</b> | <b>b (Å)</b> | <b>c (Å)</b> |                  |             |
| <i>Fm-3m</i> (225)                         |                     | 5.2267(5)    | 5.2267(5)    | 5.2267(5)    |                  |             |
| <b>Atom</b>                                | <b>Wyckoff Site</b> | <b>x</b>     | <b>y</b>     | <b>z</b>     | <b>Occupancy</b> | <b>Uiso</b> |
| Tm1                                        | 4a                  | 0            | 0            | 0            | 0.75             | 0.0215(3)   |
| Ta1                                        | 4a                  | 0            | 0            | 0            | 0.25             | 0.0215(3)   |
| O1                                         | 8c                  | 0.25         | 0.25         | 0.25         | 0.875            | 0.0627(5)   |

---

|                                            |                     |              |              |              |                  |             |
|--------------------------------------------|---------------------|--------------|--------------|--------------|------------------|-------------|
| <b>Yb<sub>3</sub>TaO<sub>7</sub></b> (PDF) |                     | <b>a (Å)</b> | <b>b (Å)</b> | <b>c (Å)</b> |                  |             |
| <i>Fm-3m</i> (225)                         |                     | 5.2093(3)    | 5.2093(3)    | 5.2093(3)    |                  |             |
| <b>Atom</b>                                | <b>Wyckoff Site</b> | <b>x</b>     | <b>y</b>     | <b>z</b>     | <b>Occupancy</b> | <b>Uiso</b> |
| Yb1                                        | 4a                  | 0            | 0            | 0            | 0.75             | 0.0234(3)   |
| Ta1                                        | 4a                  | 0            | 0            | 0            | 0.25             | 0.0234(3)   |
| O1                                         | 8c                  | 0.25         | 0.25         | 0.25         | 0.875            | 0.0623(3)   |

---

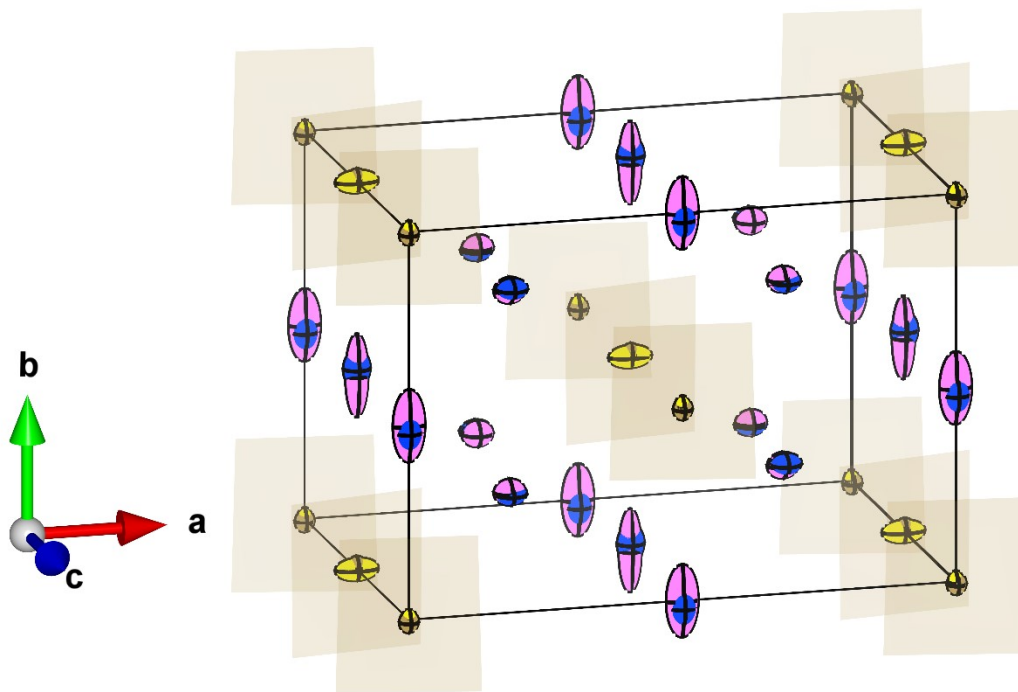

**Supplementary Figure 5:** Overlaid  $C222_1$  ( $\Gamma_1^-$ ) and  $C2/m$  ( $\Gamma_3^+$ )  $\text{Ho}_3\text{TaO}_7$  structural models from short-range PDF refinement performed at 100 K. Solid black lines indicate the respective unit cell while shaded brown regions represent  $\text{TaO}_6$  octahedra. Ta and Ho cations in respective atomic sites in the  $C222_1$  structure are indicated as solid dark brown and blue ellipsoids, while Ta and Ho cations in respective atomic sites in the  $C2/m$  structure are indicated as solid yellow and pink ellipsoids. The ellipsoids represent the extent of anisotropic thermal vibrations,  $U_{11}$ ,  $U_{22}$  and  $U_{33}$ .

**Supplementary Table 4:** Structural information for localized 100 K temperature short-range PDF data refinements. Unit cell parameters, fractional positional coordinates and thermal factors are followed by sigma values.

| <b>Pr<sub>3</sub>TaO<sub>7</sub></b> (PDF, 100K) |                     | <b>a (Å)</b> | <b>b (Å)</b> | <b>c (Å)</b> |             |
|--------------------------------------------------|---------------------|--------------|--------------|--------------|-------------|
| <i>C2cm</i> (40)                                 |                     | 10.988(4)    | 7.490(3)     | 7.681(3)     |             |
| <b>Atom</b>                                      | <b>Wyckoff Site</b> | <b>x</b>     | <b>y</b>     | <b>z</b>     | <b>Uiso</b> |
| Pr1                                              | 4a                  | 0.5042(14)   | 0            | 0            | 0.0109(9)   |
| Pr2                                              | 4b                  | 0.2300(7)    | 0.2015(11)   | 0.25         | 0.0042(8)   |
| Pr3                                              | 4b                  | 0.2758(7)    | 0.705(1)     | 0.25         | 0.0034(6)   |
| Ta1                                              | 4a                  | 0.0054(7)    | 0            | 0            | 0.0047(3)   |
| O1                                               | 8c                  | 0.8709(5)    | 0.8254(7)    | 0.037(1)     | 0.0090(6)   |
| O2                                               | 8c                  | 0.625        | 0.3059(6)    | 0.4632(8)    | 0.0053(4)   |
| O3                                               | 4b                  | 0.1337(7)    | 0.4686(9)    | 0.25         | 0.0057(6)   |
| O4                                               | 4b                  | 0.3751(6)    | 0.9833(8)    | 0.25         | 0.0046(6)   |
| O5                                               | 4b                  | 0.9982(8)    | 0.0716(6)    | 0.25         | 0.0049(5)   |

| <b>Ho<sub>3</sub>TaO<sub>7</sub></b> (PDF, 100K) |                     | <b>a (Å)</b> | <b>b (Å)</b> | <b>c (Å)</b> |             |
|--------------------------------------------------|---------------------|--------------|--------------|--------------|-------------|
| <i>C222<sub>1</sub></i> (20)                     |                     | 10.486(5)    | 7.419(3)     | 7.445(2)     |             |
| <b>Atom</b>                                      | <b>Wyckoff Site</b> | <b>x</b>     | <b>y</b>     | <b>z</b>     | <b>Uiso</b> |
| Ho1                                              | 4a                  | 0            | 0.4810(7)    | 0            | 0.0080(5)   |
| Ho2                                              | 8c                  | 0.2349(3)    | 0.2362(4)    | 0.7451(7)    | 0.0062(3)   |
| Ta1                                              | 4a                  | 0            | 0.9960(7)    |              | 0.0029(4)   |
| O1                                               | 8c                  | 0.3726(5)    | 0.3122(7)    | 0.9639(8)    | 0.0098(7)   |
| O2                                               | 8c                  | 0.3775(4)    | 0.2899(5)    | 0.5230(7)    | 0.0060(6)   |
| O3                                               | 4b                  | 0.0667(5)    | 0            | 0.75         | 0.0073(5)   |
| O4                                               | 4b                  | 0.6281(8)    | 0            | 0.75         | 0.0076(5)   |
| O5                                               | 4b                  | 0.3628(7)    | 0            | 0.75         | 0.0084(8)   |



| <b>Yb<sub>3</sub>TaO<sub>7</sub></b> (PDF, 100K) |                     | <b>a (Å)</b> | <b>b (Å)</b> | <b>c (Å)</b> |             |
|--------------------------------------------------|---------------------|--------------|--------------|--------------|-------------|
| <i>C2mm</i> (38)                                 |                     | 10.558(4)    | 7.171(3)     | 7.443(3)     |             |
| <b>Atom</b>                                      | <b>Wyckoff Site</b> | <b>x</b>     | <b>y</b>     | <b>z</b>     | <b>Uiso</b> |
| Yb1                                              | 4c                  | 0.4799(5)    | 0            | 0.7210(4)    | 0.0104(4)   |
| Yb2                                              | 4d                  | 0.2166(5)    | 0.7499(8)    | 0            | 0.0124(5)   |
| Yb3                                              | 4e                  | 0.2289(5)    | 0.2508(6)    | 0.5          | 0.0077(5)   |
| Ta1                                              | 4c                  | 0.9996(6)    | 0            | 0.7328(6)    | 0.0037(4)   |
| O1                                               | 8f                  | 0.5929(6)    | 0.2684(4)    | 0.2656(5)    | 0.0072(5)   |
| O2                                               | 8f                  | 0.875000     | 0.7589(8)    | 0.1839(5)    | 0.0116(6)   |
| O3                                               | 2a                  | 0.0379(11)   | 0            | 0            | 0.012(2)    |
| O4                                               | 2b                  | 0.9520(8)    | 0            | 0.5          | 0.007(1)    |
| O5                                               | 2a                  | 0.6156(13)   | 0            | 0            | 0.019(1)    |
| O6                                               | 2b                  | 0.3598(13)   | 0            | 0.5          | 0.019(1)    |
| O7                                               | 2a                  | 0.3755(18)   | 0            | 0            | 0.019(1)    |
| O8                                               | 2b                  | 0.6089(16)   | 0            | 0.5          | 0.019(1)    |
